# Supplementary material for: Interference of Quercetin on Astragalus Polysaccharide-Induced Macrophage Activation
Source: PubMed Central journal article supplement (PMC6100010; doi:10.3390/molecules23071563), 2018-06-28
Supplement: molecules-23-01563-s001.pdf [file molecules-23-01563-s001.pdf]

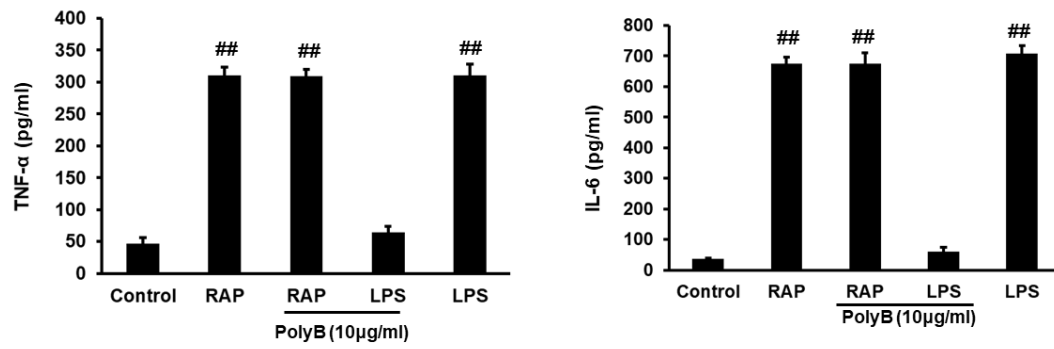

Supplementary Figure 1: RAW264.7 cells were treated with RAP (100μg/mL) or LPS (100ng/mL) with or without PolyB for 24h (## $P < 0.01$  compared with control group).
